# Supplementary material
Source: publisher figshare collection journal article supplement (https://frontiersin.figshare.com/ndownloader/files/34443521)
Supplement: Supplementary file 1 [file 34443521]

Supplementary Material

# Supplementary Table and Online Appendices

## Supplementary Table 1. Descriptive Statistics for Full Sample [for White Respondents Only]

|  | Frequency (Percentage) | Mean (Std.Dev) | Mode | Median |
| --- | --- | --- | --- | --- |
| Democrat | 433 (45.10%)  [286 (40.17%)] | -- | -- | -- |
| Independent | 127 (13.23%)  [82 (11.52%)] | -- | -- | -- |
| Republican | 400 (41.67%)  [344 (48.31%)] | -- | -- | -- |
|  |  |  |  |  |
| Ideology | -- | 3.86 (1.76)  [3.96 (1.78)] | 4 (Moderate)  [4 (Moderate)] | -- |
|  |  |  |  |  |
| Women | 496 (51.29)  [359 (49.72%)] | -- | -- | -- |
| Men | 471 (48.71%)  [363 (50.28%)] | -- | -- | -- |
|  |  |  |  |  |
| Education | -- | -- | 6 (Bachelor’s Degree)  [6 (Bachelor’s Degree)] | -- |
|  |  |  |  |  |
| Age (in years) | -- | 44.93 (17.16)  [48.79 (16.37)] | -- | -- |
|  |  |  |  |  |
| Hispanic | 187 (19.48)  [115 (16.13%)] | -- | -- | -- |
|  |  |  |  |  |
| Income | -- | 9.42 (7.26) $50-55k  [10.05 (7.30) $55-60k] | -- | 8 ($45-50k)  [9 ($50-55k)] |
|  |  |  |  |  |
| Northeast | 214 (20.48%)  [152 (20.91%)] | -- | -- | -- |
| Midwest | 200 (19.14%)  [159 (21.87%)] | -- | -- | -- |
| South | 376 (35.98%)  [268 (36.86%)] | -- | -- | -- |
| West | 255 (24.40%)  [148 (20.36%)] | -- | -- | -- |
|  |  |  |  |  |
| Political | -- | .52 (.29) | -- | -- |
| Knowledge |  | [.56 (.28)] |  |  |
|  |  |  |  |  |
| Conspiratorial | -- | 3.24 (.92) | -- | -- |
| Thinking |  | [3.20 (.95)] |  |  |
|  |  |  |  |  |
| Chinese Virus | -- | .48 (.25) | -- | -- |
|  |  | [.52 (.41)] |  |  |
|  |  |  |  |  |
| Racial | -- | .52 (.25) | -- | -- |
| Resentment |  | [.55 (.26)] |  |  |
|  |  |  |  |  |
| White | -- | .55 (.24) | -- | -- |
| Identity |  | [.56 (.24)] |  |  |

## Supplementary Table 2. Question Wording (Response options in italics)

| **COVID-19 Protective Health Behaviors** |  |
| --- | --- |
| If a vaccine for the coronavirus becomes available, how likely are you to get vaccinated? | *Extremely likely, Very likely, Somewhat likely, Not very likely, Not likely at all* |
|  |  |
| How frequently do you do the following? | *Always, Most of the time, About half the time, Sometimes, Never* |
| Wear a facemask when going out in public |  |
| Stay at least six feet away from others in public places |  |
|  |  |
| Have you done any of the following to prevent the spread of coronavirus? | *Yes, No* |
| Changed travel plans |  |
| Worked from home |  |
| Regularly washed your hands |  |
| Avoided dining-in at restaurants or bars |  |
| Canceled social engagements |  |
| Sanitized your home or workspace with disinfectant |  |
| Curbside pick-up or delivery |  |
| No touch greetings in person |  |
|  |  |
| If a vaccine for the coronavirus becomes available, how likely are you to get vaccinated? | *Extremely likely, Very likely, Somewhat likely, Not very likely, Not likely at all* |
|  |  |
| **Conspiracy Theories** |  |
| The news these days is dominated by coverage of the coronavirus, or COVID-19, pandemic as it spreads across the world. In this time of uncertainty, people have tried to understand the origins, spread, and treatment of the virus. Below you will see a series of statements about the coronavirus. Please indicate your belief in the statement. |  |
|  |  |
| Some people believe that the [Chinese government/ World Health Organization/ U.S. government] intentionally withheld information to downplay the severity of the outbreak. Others do not believe this. What do you think?  The [Chinese government/ World Health Organization/ U.S. government] … | *Definitely withheld information, Probably withheld information, Probably did not withhold information, Definitely did not withhold information* |
|  |  |
| Some people believe that [Democrats/opponents of Donald Trump] are intentionally inflating case and death counts to make President Trump look bad. Others do not believe this. What do you think?  [Democrats/opponents of Donald Trump] are… | *Definitely inflating counts, Probably inflating counts, Probably not inflating counts, Definitely not inflating counts* |
|  |  |
| Some people believe that COVID-19 was created and released as a bioweapon by [China/ a foreign government/ the U.S. Military]. Others do not believe this. What do you think?  [China/ a foreign government/ the U.S. Military]… | *Definitely released the virus as a bioweapon, Probably released the virus as a bioweapon, Probably did not release the virus as a bioweapon, Definitely did not release the virus as a bioweapon* |
|  |  |
| Some people believe that the coronavirus is spread by [global elites/ elites/ Bill Gates] using the 5G wireless system. Others do not believe this. What do you think?  [Global elites/ Elites/ Bill Gates] … | *Definitely spread the virus with the 5G system, Probably spread the virus with the 5G system, Probably did not spread the virus with the 5G system, Definitely did not spread the virus with the 5G system* |
|  |  |
| Some people believe that [President Trump/ US officials] is[are] promoting the use of hydroxychloroquine as a treatment because he will benefit financially from its use. Others do not believe this. What do you think?  [President Trump/ US officials]… | *Definitely is[are] benefiting financially, Probably is[are] benefiting financially, Probably is[are] not benefiting financially, Definitely is[are] not benefiting financially* |
|  |  |
| Some people believe that [Democrats/ health officials] are pushing social distancing in a plot to tank the economy before the 2020 election. Others do not believe this. What do you think?  [Democrats/ health officials] are… | *Definitely pushing a plot to tank the economy, Probably pushing a plot to tank the economy, Probably not pushing a plot to tank the economy, Definitely not pushing a plot to tank the economy* |
|  |  |
| **Conspiratorial Thinking** |  |
| How much do you agree or disagree with the following statements? | *Strongly agree, Somewhat agree, Neither agree nor disagree, Somewhat disagree, Strongly disagree* |
| Much of our lives are being controlled by plots hatched in secret places. |  |
| Even though we live in a democracy, a few people will always run things anyway. |  |
| The people who really 'run' the country are not known to the voters. |  |
| Big events like wars, economic recessions, and the outcomes of elections are controlled by small groups of people who are working in secret against the rest of us. |  |
|  |  |
| **White Identity** |  |
| How important is being white to your identity? | *Extremely important, Very important, Somewhat important, Not very important, Not at all important* |
|  |  |
| To what extent do you feel that white people in this country have a lot to be proud of? | *A great deal, Quite a bit, Somewhat, A little, None at all* |
|  |  |
| How much would you say that whites in this country have a lot in common with one another? | *A great deal, A lot, A moderate amount, A little, None at all* |
|  |  |
| How likely is it that many whites are unable to find a job because employers are hiring minorities instead? | *Extremely likely, Very likely, Somewhat likely, Not very likely, Not likely at all* |
|  |  |
| How important is it that whites work together to change laws that are unfair to whites? | *Extremely important, Very important, Somewhat important, Not very important, Not at all important* |
|  |  |
| **Racial Resentment** |  |
| You will now read several statements about society in general. After each one, please indicate how strongly you agree or disagree with the statement. | *Disagree strongly, Disagree somewhat, Neither agree nor disagree, Agree somewhat, Agree strongly* |
| Irish, Italian, Jewish, and many other minorities overcame prejudice and worked their way up. Blacks should do the same without any special favors. |  |
| Generations of slavery and discrimination have created conditions that make it difficult for Blacks to work their way out of the lower class. |  |
| Over the past few years, Blacks have gotten less than they deserve. |  |
| It’s really a matter of some people not trying hard enough; if Blacks would only try harder they could be just as well off as whites. |  |
|  |  |
| **Explicit Pandemic Racial Attitude** |  |
| Some people believe the use of the phrase ‘Chinese virus’ is not racist, but simply a description of where the virus originated. Others do not believe this. What do you think?  The phrase ‘Chinese virus’ is… | *Definitely racist, Probably racist, Probably not racist, Definitely not racist* |
|  |  |
| **Partisanship** |  |
| Generally speaking, do you usually think of yourself as a Democrat, a Republican, an Independent, or what? | *Democrat, Republican, Independent, Other Party, please specify.* |
| [Branched if Democrat] Would you call yourself a strong Democrat or a not very strong Democrat? | *Strong Democrat, Not very strong Democrat* |
| [Branched if Republican] Would you call yourself a strong Republican or a not very strong Republican? | *Strong Republican, Not very strong Republican* |
| [Branched if Independent or Other Party] Do you think of yourself as closer to the Democratic Party or the Republican Party? | *Closer to the Democratic Party, Closer to the Republican Party, Closer to Neither Party* |
|  |  |
| **Ideology** |  |
| We hear a lot of talk these days about liberals and conservatives. Here is a seven-point scale on which the political views that people might hold are arranged from extremely liberal to extremely conservative. Where would you place yourself on this scale? | *Very Liberal, Somewhat Liberal, Middle of the Road, Somewhat Conservative, Conservative, Very Conservative* |
|  |  |
| **Sex** |  |
| How do you identify? | *Male, Female, Prefer to self-describe, Prefer not to say* |
|  |  |
| **Education** |  |
| What is the highest level of education you have completed? | *Grade School, Some High School, High School Diploma or Equivalent, Some College, Associate’s Degree, Bachelor’s Degree, Master’s Degree, Advanced Degree (PhD, DPHIL, J.D., M.D., DDS, etc.)* |
|  |  |
| **Ethnicity [Hispanic]** |  |
| Are you Spanish, Hispanic, or Latino? | *No, Yes* |
|  |  |
| **Race [*used to identify White respondents]** |  |
| Below is a list of five race categories. Please choose one or more groups that best describe you. [Check all that apply] | *White, Black or African-American, Native American, Asian, Native Hawaiian or other Pacific Islander, Other, please specify* |
|  |  |
| **Household Income [Lucid Theorem Demographic]** |  |
| *Less than $14,999; $15,000 to $19,999; $20,000 to $24,999; $25,000 to $29,999; $30,000 to $34,999; $35,000 to $39,999; $40,000 to $44,999; $45,000 to $49,999; $50,000 to $54,999; $55,000 to $59,999; $60,000 to $64,999; $65,000 to $69,999; $70,000 to $74,999; $75,000 to $79,999; $80,000 to $84,999; $85,000 to $89,999; $90,000 to $94,999; $95,000 to $99,999; $100,000 to $124,999; $125,000 to $149,999; $150,000 to $174,999; $175,000 to $199,999; $200,000 to $249,999; $250,000 and above; Prefer not to answer* |  |
|  |  |
| **Region [Lucid Theorem Demographic]** |  |
| Northeast, South, Midwest, West |  |
|  |  |
| **Age** |  |
| What age did you turn on your last birthday? |  |
|  |  |
| **Political Knowledge** |  |
| For how many years is a United States Senator elected – that is, how many years are there in one full term of office for a U.S. Senator? | *2, 3, 4, 5, 6, Senators serve lifetime appointments* |
|  |  |
| On which of the following does the U.S. federal government currently spend the least? | *Foreign aid, Medicare, National defense, Social Security* |
|  |  |
| Which party currently has the most members in the U.S. Senate? | *Democrats, Republicans* |
|  |  |
| What job or political office does John Roberts currently hold? | *Vice President, Chief Justice of the Supreme Court, Attorney General, Secretary of Education* |
|  |  |
| What job or political office does Angela Merkel currently hold? | *UN Secretary General, European Union President, Chancellor of Germany, Prime Minister of the United Kingdom* |

**1.3** Supplementary Table 3. Question Wording Experiment Conditions

| **Condition** | ***N* Full Sample** | **%** | ***N* White Respondents** | **%** |
| --- | --- | --- | --- | --- |
| US Government | 330 | 33.64% | 234 | 32.19% |
| China | 322 | 32.82% | 233 | 32.05% |
| WHO | 329 | 33.54% | 260 | 35.76% |
| *Total* | *981* | *100%* | *727* | *100%* |

| **Condition** | ***N* Full Sample** | **%** | ***N* White Respondents** | **%** |
| --- | --- | --- | --- | --- |
| US Military | 323 | 32.93% | 249 | 34.25% |
| China | 323 | 32.93% | 234 | 32.19% |
| Foreign Government | 335 | 34.14% | 244 | 33.56% |
| *Total* | *981* | *100%* | *727* | *100%* |

| **Condition** | ***N* Full Sample** | **%** | ***N* White Respondents** | **%** |
| --- | --- | --- | --- | --- |
| Global Elites | 328 | 33.44% | 251 | 34.53% |
| Elites | 328 | 33.44% | 229 | 31.50% |
| Bill Gates | 325 | 33.13% | 247 | 33.98% |
| *Total* | *981* | *100%* | *727* | *100%* |

**1.4 Supplementary Table 4. Correlation Matrix**

| Variable | Withheld Info | Bioweapon | 5G | Chinese Virus | CT Index | ConThink Index | Racial Resent | White Id | Ideo | Educ | Inc | Age | Pol Know |
| --- | --- | --- | --- | --- | --- | --- | --- | --- | --- | --- | --- | --- | --- |
| Withheld Info | 1.00 | ***0.25*** | ***0.23*** | *0.01* | ***0.65*** | ***0.15*** | *0.02* | ***0.21*** | *-0.02* | *0.01* | *0.03* | ***-0.16*** | ***-0.11*** |
| Bioweapon | **0.24** | 1.00 | ***0.56*** | *-0.04* | ***0.81*** | ***0.35*** | ***0.16*** | ***0.39*** | *0.06* | *0.00* | *0.04* | ***-0.20*** | ***-0.28*** |
| 5G | **0.20** | **0.54** | 1.00 | ***-0.16*** | ***0.79*** | ***0.37*** | *0.04* | ***0.43*** | *-0.02* | *0.01* | ***0.08*** | ***-0.32*** | ***-0.30*** |
| Chinese Virus | -0.00 | -0.04 | **-0.13** | 1.00 | ***-0.08*** | ***-0.10*** | ***0.48*** | ***0.11*** | ***0.47*** | ***-0.11*** | *-0.07* | ***0.22*** | ***0.10*** |
| CT Index | **0.25** | **0.50** | **0.55** | 0.02 | 1.00 | ***0.33*** | ***0.21*** | ***0.38*** | ***0.12*** | *0.04* | ***0.06*** | ***-0.11*** | ***-0.24*** |
| ConThink Index | **0.12** | **0.32** | **0.32** | **-0.11** | **0.35** | 1.00 | *0.03* | ***0.30*** | *-0.05* | *0.05* | *0.02* | ***-0.16*** | ***-0.16*** |
| Racial Resent | 0.02 | **0.14** | 0.02 | **0.45** | **0.08** | 0.00 | 1.00 | ***0.35*** | ***0.51*** | ***-0.15*** | *-0.06* | ***0.23*** | *-0.07* |
| White Id | **0.20** | **0.38** | **0.42** | **0.12** | **0.44** | **0.28** | **0.35** | 1.00 | ***0.18*** | ***0.10*** | ***0.12*** | *0.01* | ***-0.15*** |
| Ideo | **-0.06** | 0.05 | -0.02 | **0.39** | -0.02 | -0.05 | **0.46** | **0.17** | 1.00 | *-0.03* | *0.07* | ***0.22*** | *0.06* |
| Educ | 0.03 | 0.00 | -0.00 | **-0.06** | 0.02 | 0.05 | **-0.09** | **0.09** | -0.01 | 1.00 | *0.48* | *0.05* | ***0.21*** |
| Inc | 0.05 | 0.01 | -0.01 | -0.03 | 0.02 | 0.02 | -0.01 | **0.11** | **0.07** | **0.47** | 1.00 | *-0.02* | ***0.16*** |
| Age | **-0.14** | **-0.20** | **-0.34** | **0.23** | **-0.30** | **-0.14** | **0.24** | 0.02 | **0.22** | **0.09** | **0.09** | 1.00 | ***0.29*** |
| Pol Know | **-0.07** | **-0.27** | **-0.34** | **0.10** | **-0.31** | **-0.14** | -0.02 | **-0.15** | **0.08** | **0.23** | **0.21** | **0.34** | 1.00 |

Note: Bolded correlations significant at p<.05. Italicized correlations reflect relationships for white respondents only.

**1.5 Supplementary Table 5: Main Effect of Racial Attitudes and Experimental Condition Effects on Conspiracy Theory Endorsement (White Respondents Only)**

|  | Withheld  Information | Bioweapon | Spread by 5G | Withheld  Information | Bioweapon | Spread by 5G |
| --- | --- | --- | --- | --- | --- | --- |
| Conspiratorial | 0.03+ | 0.08* | 0.07* | 0.02 | 0.08* | 0.07* |
| Thinking | (0.02) | (0.01) | (0.01) | (0.01) | (0.01) | (0.01) |
|  |  |  |  |  |  |  |
| “Chinese Virus | 0.05 | -0.08* | -0.13* | 0.02 | -0.07+ | -0.12* |
| Is Racist” | (0.04) | (0.04) | (0.04) | (0.04) | (0.04) | (0.04) |
|  |  |  |  |  |  |  |
| Racial | -0.07 | 0.08 | -0.04 | -0.50* | -0.13 | -0.07 |
| Resentment | (0.07) | (0.06) | (0.05) | (0.11) | (0.09) | (0.08) |
|  |  |  |  |  |  |  |
| White | 0.23* | 0.40* | 0.43* | 0.30* | 0.42* | 0.32* |
| Identity | (0.06) | (0.06) | (0.06) | (0.10) | (0.09) | (0.10) |
|  |  |  |  |  |  |  |
| Democrat | 0.03 | -0.04 | -0.02 | 0.18* | 0.06 | 0.00 |
|  | (0.05) | (0.04) | (0.04) | (0.07) | (0.06) | (0.07) |
|  |  |  |  |  |  |  |
| Republican | 0.08+ | 0.05 | 0.09* | -0.01 | 0.06 | 0.13+ |
|  | (0.04) | (0.04) | (0.04) | (0.07) | (0.06) | (0.07) |
|  |  |  |  |  |  |  |
| Ideology | -0.00 | 0.00 | 0.00 | -0.01 | 0.01 | -0.00 |
|  | (0.01) | (0.01) | (0.01) | (0.01) | (0.01) | (0.01) |
|  |  |  |  |  |  |  |
| Sex (Female) | 0.02 | 0.00 | -0.01 | -0.00 | 0.00 | -0.01 |
|  | (0.03) | (0.02) | (0.02) | (0.02) | (0.02) | (0.02) |
|  |  |  |  |  |  |  |
| Education | -0.00 | -0.00 | -0.00 | 0.00 | -0.01 | -0.00 |
|  | (0.01) | (0.01) | (0.01) | (0.01) | (0.01) | (0.01) |
|  |  |  |  |  |  |  |
| Hispanic | 0.01 | 0.04 | 0.14* | 0.04 | 0.06+ | 0.14* |
|  | (0.03) | (0.03) | (0.03) | (0.03) | (0.03) | (0.03) |
|  |  |  |  |  |  |  |
| Income | 0.00 | 0.00 | 0.00 | 0.00 | 0.00 | 0.00 |
|  | (0.00) | (0.00) | (0.00) | (0.00) | (0.00) | (0.00) |
|  |  |  |  |  |  |  |
| Midwest | 0.01 | -0.00 | 0.01 | -0.00 | -0.00 | 0.01 |
|  | (0.04) | (0.04) | (0.04) | (0.03) | (0.04) | (0.04) |
|  |  |  |  |  |  |  |
| South | -0.03 | -0.01 | -0.03 | -0.03 | -0.00 | -0.03 |
|  | (0.03) | (0.03) | (0.03) | (0.03) | (0.03) | (0.03) |
|  |  |  |  |  |  |  |
| West | -0.02 | 0.03 | -0.00 | -0.03 | 0.03 | -0.00 |
|  | (0.04) | (0.04) | (0.03) | (0.03) | (0.03) | (0.03) |
|  |  |  |  |  |  |  |
| Age | -0.00* | -0.00* | -0.00* | -0.00* | -0.00* | -0.00* |
|  | (0.00) | (0.00) | (0.00) | (0.00) | (0.00) | (0.00) |
|  |  |  |  |  |  |  |
| Political | -0.06 | -0.19* | -0.18* | -0.06 | -0.20* | -0.18* |
| Knowledge | (0.05) | (0.05) | (0.04) | (0.04) | (0.04) | (0.04) |
|  |  |  |  |  |  |  |
| Condition 1 |  |  |  | -0.01 | 0.22* | -0.13 |
|  |  |  |  | (0.12) | (0.10) | (0.10) |
|  |  |  |  |  |  |  |
| Condition 2 |  |  |  | -0.38* | 0.10 | -0.04 |
|  |  |  |  | (0.11) | (0.11) | (0.12) |
|  |  |  |  |  |  |  |
| Condition 1 x |  |  |  | 0.73* | 0.20 | 0.02 |
| Racial Resentment |  |  |  | (0.13) | (0.13) | (0.11) |
|  |  |  |  |  |  |  |
| Condition 2 x |  |  |  | 0.68* | 0.38* | 0.07 |
| Racial Resentment |  |  |  | (0.12) | (0.13) | (0.10) |
|  |  |  |  |  |  |  |
| Condition 1 x |  |  |  | -0.30* | 0.01 | 0.21 |
| White Identity |  |  |  | (0.12) | (0.12) | (0.14) |
|  |  |  |  |  |  |  |
| Condition 2 x |  |  |  | 0.03 | -0.09 | 0.10 |
| White Identity |  |  |  | (0.12) | (0.13) | (0.14) |
|  |  |  |  |  |  |  |
| Condition 1 x |  |  |  | -0.18+ | -0.22* | 0.01 |
| Democrat |  |  |  | (0.11) | (0.09) | (0.08) |
|  |  |  |  |  |  |  |
| Condition 2 x |  |  |  | -0.27* | -0.08 | -0.07 |
| Democrat |  |  |  | (0.10) | (0.09) | (0.10) |
|  |  |  |  |  |  |  |
| Condition 1 x |  |  |  | 0.10 | -0.05 | -0.04 |
| Republican |  |  |  | (0.10) | (0.09) | (0.09) |
|  |  |  |  |  |  |  |
| Condition 2 x |  |  |  | 0.14 | 0.03 | -0.08 |
| Republican |  |  |  | (0.10) | (0.09) | (0.11) |
|  |  |  |  |  |  |  |
| Constant | 0.60* | 0.11 | 0.11 | 0.73* | -0.05 | 0.15 |
|  | (0.10) | (0.09) | (0.09) | (0.11) | (0.10) | (0.11) |
| *N* | 652 | 651 | 652 | 652 | 651 | 652 |
| adj. *R*2 | 0.067 | 0.265 | 0.371 | 0.341 | 0.391 | 0.367 |

Standard errors in parentheses + p<0.10, * p<0.05

Note: Condition 1 reflects the following question wording for each DV, relatively: China/China/Elites. Condition 2 reflects the following question wording for each DV, relatively: WHO/Foreign Government/Bill Gates. The baseline (excluded) categories are US Govt/US Military/Global Elites.

**1.6 Supplementary Figure 1: Effects of Partisanship on Conspiracy Theory Endorsement, by Condition Assignment (White Respondents Only)**

**
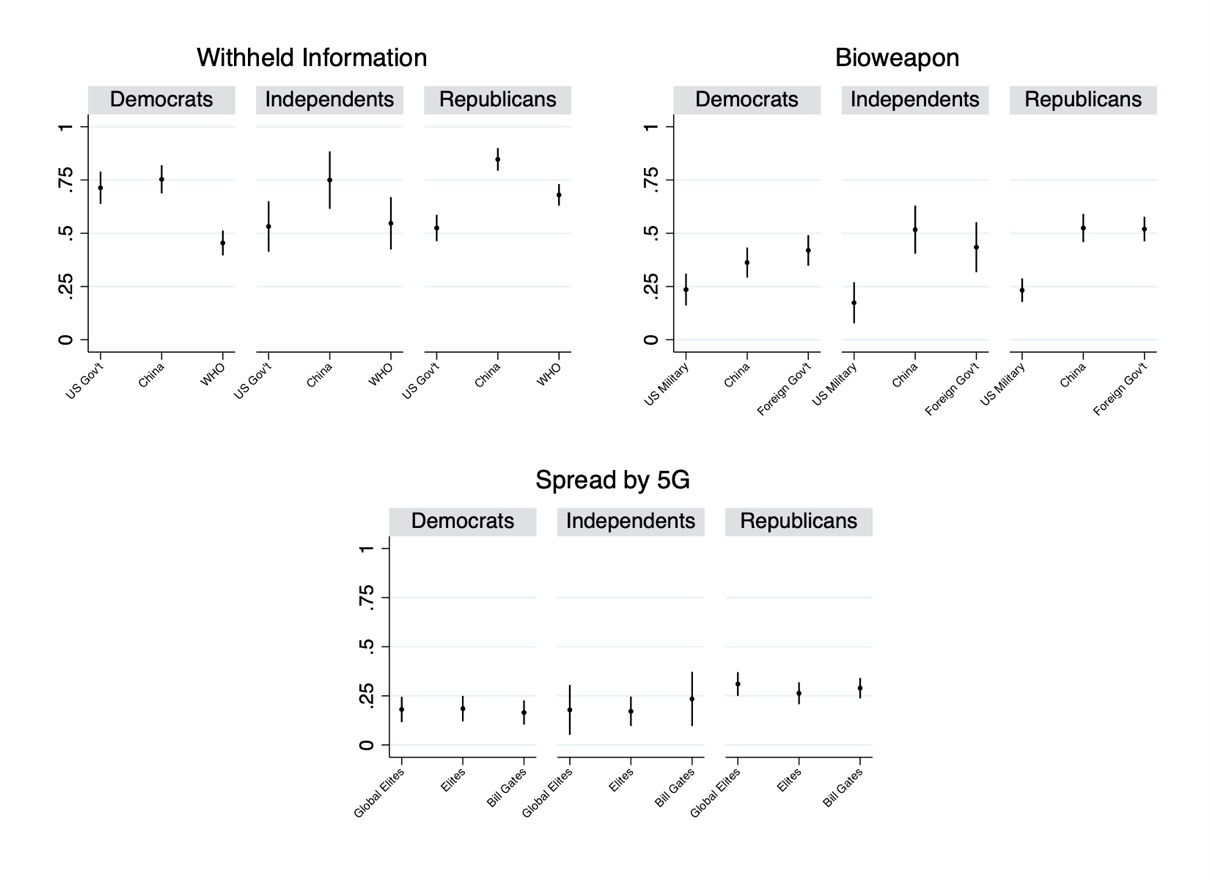
**

**1.7 Supplementary Table 6: Main Effect of Racial Attitudes and Experimental Condition Effects on Conspiracy Theory Endorsement for White Respondents Only (No Controls)**

|  | Withheld  Information | Bioweapon | Spread by 5G | Withheld  Information | Bioweapon | Spread by 5G |
| --- | --- | --- | --- | --- | --- | --- |
| Conspiratorial | 0.13* | 0.37* | 0.34* | 0.11* | 0.39* | 0.35* |
| Thinking | (0.06) | (0.05) | (0.05) | (0.05) | (0.05) | (0.05) |
|  |  |  |  |  |  |  |
| “Chinese Virus” | 0.03 | -0.07* | -0.13* | 0.02 | -0.05 | -0.13* |
| Is Racist | (0.04) | (0.03) | (0.03) | (0.03) | (0.03) | (0.03) |
|  |  |  |  |  |  |  |
| Racial | -0.10+ | 0.11* | -0.03 | -0.75* | -0.17* | -0.02 |
| Resentment | (0.06) | (0.06) | (0.05) | (0.10) | (0.08) | (0.07) |
|  |  |  |  |  |  |  |
| White | 0.29* | 0.43* | 0.53* | 0.29* | 0.47* | 0.49* |
| Identity | (0.06) | (0.06) | (0.06) | (0.10) | (0.09) | (0.10) |
|  |  |  |  |  |  |  |
| Condition 1 |  |  |  | -0.24* | 0.03 | -0.09 |
|  |  |  |  | (0.08) | (0.06) | (0.06) |
|  |  |  |  |  |  |  |
| Condition 2 |  |  |  | -0.66* | 0.02 | -0.02 |
|  |  |  |  | (0.07) | (0.07) | (0.07) |
|  |  |  |  |  |  |  |
| Condition 1 x |  |  |  | 0.94* | 0.36* | -0.07 |
| Racial Resentment |  |  |  | (0.11) | (0.11) | (0.10) |
|  |  |  |  |  |  |  |
| Condition 2 x |  |  |  | 1.00* | 0.54* | 0.04 |
| Racial Resentment |  |  |  | (0.11) | (0.11) | (0.10) |
|  |  |  |  |  |  |  |
| Condition 1 x |  |  |  | -0.15 | -0.01 | 0.15 |
| White Identity |  |  |  | (0.12) | (0.12) | (0.13) |
|  |  |  |  |  |  |  |
| Condition 2 x |  |  |  | 0.14 | -0.10 | -0.05 |
| White Identity |  |  |  | (0.12) | (0.13) | (0.15) |
|  |  |  |  |  |  |  |
| Constant | 0.45* | -0.08* | -0.16* | 0.78* | -0.13* | -0.13* |
|  | (0.04) | (0.04) | (0.03) | (0.05) | (0.05) | (0.05) |
| *N* | 714 | 713 | 713 | 714 | 713 | 713 |
| adj. *R*2 | 0.051 | 0.213 | 0.267 | 0.276 | 0.343 | 0.267 |

Standard errors in parentheses

+ p<0.10, * p<0.05

Note: Condition 1 reflects the following question wording for each DV, relatively: China/China/Elites. Condition 2 reflects the following question wording for each DV, relatively: WHO/Foreign Government/Bill Gates. The baseline (excluded) categories are US Govt/US Military/Global Elites.

**1.8 Supplementary Table 7: Effect of Conspiracy Theory Endorsement on COVID-19 Preventative Behaviors for White Respondents Only (No Controls)**

|  | Protective  Behavior Scale | Wear Facemask | Stay Six Feet Apart | Likelihood of Vaccination |
| --- | --- | --- | --- | --- |
| Conspiratorial | -0.23 | -0.00 | 0.02 | -0.17* |
| Thinking | (0.32) | (0.06) | (0.04) | (0.06) |
|  |  |  |  |  |
| Conspiracy Theory | -0.74* | -0.21* | -0.22* | -0.11+ |
| Index | (0.36) | (0.06) | (0.04) | (0.06) |
|  |  |  |  |  |
| “Chines Virus” | -0.53* | -0.14* | -0.07* | -0.12* |
| Is Racist | (0.17) | (0.03) | (0.02) | (0.03) |
|  |  |  |  |  |
| Racial | -1.41* | -0.21* | -0.06+ | -0.28* |
| Resentment | (0.28) | (0.06) | (0.03) | (0.06) |
|  |  |  |  |  |
| White | 1.42* | 0.28* | 0.17* | 0.39* |
| Identity | (0.37) | (0.06) | (0.05) | (0.06) |
|  |  |  |  |  |
| Constant | 6.93* | 0.91* | 0.92* | 0.83* |
|  | (0.21) | (0.03) | (0.02) | (0.04) |
| *N* | 684 | 714 | 713 | 714 |
| adj. *R*2 | 0.079 | 0.103 | 0.072 | 0.118 |

Standard errors in parentheses

+ p<0.10, * p<0.05
